# Supplementary material
Source: PubMed Central journal article supplement (PMC2596207)
Supplement: 0806310105_0806310105SI.pdf [file 0806310105_0806310105SI.pdf]

# Supporting Information

Quintana et al. 10.1073/pnas.0806310105

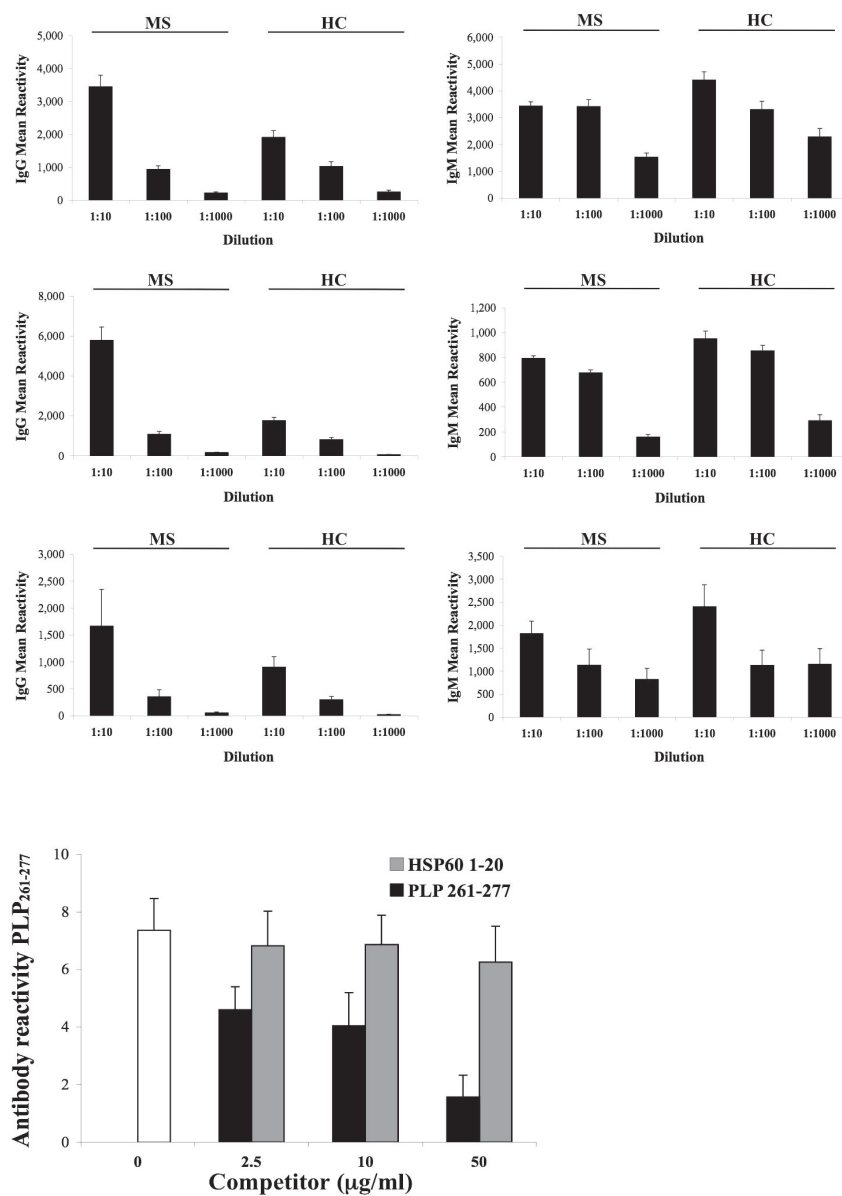

**Fig. S1.** Performance of antigen microarrays. (A) Mean IgG and IgM reactivity to CNS, HSP or lipid antigens in RRMS and HC serum samples. Results are presented as mean + SEM. \*,  $P < 0.05$ ; \*\*,  $P < 0.01$ ; and \*\*\*,  $P < 0.001$  (2-way ANOVA) when compared to HC samples tested at the same dilution. (B) IgG reactivity to PLP<sub>261-277</sub> of RRMS sera at a 1:10 dilution preincubated with different concentrations of PLP<sub>261-277</sub> or HSP60<sub>1-20</sub>. \*\*,  $P < 0.01$  and \*\*\*,  $P < 0.001$  compared to samples preincubated with no competitor.



## Other Supporting Information Files

[Table S1 \(XLS\)](#)

[Table S2 \(PDF\)](#)

[Table S3 \(PDF\)](#)

[Table S4 \(XLS\)](#)

[Table S5 \(XLS\)](#)

[Table S6 \(PDF\)](#)

[Table S7 \(PDF\)](#)

[Table S8 \(XLS\)](#)

[Table S9 \(XLS\)](#)
