# Supplementary material
Source: PubMed Central journal article supplement (PMC2596207)
Supplement: 0806310105_ST2_PDF.pdf [file 0806310105_ST2_PDF.pdf]

**Table S2. Comparison of antigen microarrays with ELISA**

| <b>Dilution</b>     | <b>HSP60-1</b> |       | <b>HSP60-2</b> |       | <b>HSP60-3</b> |       | <b>MBP</b> |       | <b>PLP</b> |       | <b>GM4</b> |       |
|---------------------|----------------|-------|----------------|-------|----------------|-------|------------|-------|------------|-------|------------|-------|
|                     | Array          | ELISA | Array          | ELISA | Array          | ELISA | Array      | ELISA | Array      | ELISA | Array      | ELISA |
| <b>1:100</b>        | MAX            | 1.98  | MAX            | 1.77  | 45,693         | 1.64  | MAX        | 1.51  | MAX        | 2.31  | MAX        | 3.13  |
| <b>1:1,000</b>      | MAX            | 1.24  | MAX            | 1.29  | 23,731         | 0.73  | 46,314     | 1.09  | MAX        | 1.16  | 29,587     | 1.61  |
| <b>1:10,000</b>     | 48,930         | 0.64  | 39,837         | 0.83  | 5,375          | 0.29  | 23,384     | 0.75  | 42,084     | 0.53  | 16,749     | 0.5   |
| <b>1:100,000</b>    | 31,513         | 0     | 3,489          | 0.17  | 1,858          | 0     | 14,423     | 0.31  | 12,294     | 0.3   | 7,313      | 0     |
| <b>1:1,000,000</b>  | 2,380          | 0     | 742            | 0     | 0              | 0     | 6,916      | 0     | 6,837      | 0     | 1,598      | 0     |
| <b>1:10,000,000</b> | 0              | 0     | 0              | 0     | 0              | 0     | 1,810      | 0     | 1,332      | 0     | 0          | 0     |

Identical samples of diluted polyclonal or monoclonal antibodies to HSP60, MBP, PLP or gangliosides GM4 were assayed using antigen microarrays and ELISA. The minimum limit for positive reactivity was set at 0.100 OD units for ELISA and 500 luminescence units for antigen microarrays. MAX indicates antigen-antibody reactivities with >65,000 luminescence units.
