# Supplementary material
Source: PubMed Central journal article supplement (PMC2596207)
Supplement: 0806310105_ST3_PDF.pdf [file 0806310105_ST3_PDF.pdf]

**Table S3. Subjects analyzed**

| Group                 | N  | Gender (F/M) | Age          | Disease Duration  | EDSS            |
|-----------------------|----|--------------|--------------|-------------------|-----------------|
| RRMS (USA)            | 39 | 31/8         | 47 (22 - 58) | 13.0 (6.0 - 27.0) | 1.5 (0.0 - 3.5) |
| RRMS (Spanish Cohort) | 51 | 33/17        | 44 (20 - 55) | 2.3 (0.0 - 24.0)  | 1.3 (0.0 - 3.5) |
| SPMS                  | 30 | 23/7         | 50 (31 - 64) | 8 (2.0 - 27.0)    | 6.0 (1.5 - 8.5) |
| PPMS                  | 37 | 20/17        | 55 (34 - 73) | 4.5 (0.0 - 25.0)  | 6.0 (1.5 - 9.5) |
| Pattern I             | 15 | 10/5         | 42 (20 - 70) | 4.1 (1.4 - 16.1)  | 3 (0.0 - 7.0)   |
| Pattern II            | 53 | 25/28        | 44 (20 - 71) | 3.3 (0.6 - 37.8)  | 2 (0.0 - 8.0)   |
| HC                    | 30 | 18/12        | 51 (20 - 72) | NA                | NA              |

The N, gender, age, disease duration and EDSS for each group are indicated as the median and range. NA, not applicable.
