# Supplementary material
Source: PubMed Central journal article supplement (PMC2596207)
Supplement: 0806310105_ST6_PDF.pdf [file 0806310105_ST6_PDF.pdf]

**Table S6. Reactivity to CNS in RRMS (CNS<sup>1</sup>), PPMS (CNS<sup>2</sup>) and SPMS (CNS<sup>3</sup>)**

| IgM | Antigen                 | CNS              |                  |                  | IgG | Antigen | CNS              |                  |                  |
|-----|-------------------------|------------------|------------------|------------------|-----|---------|------------------|------------------|------------------|
|     |                         | CNS <sup>1</sup> | CNS <sup>2</sup> | CNS <sup>3</sup> |     |         | CNS <sup>1</sup> | CNS <sup>2</sup> | CNS <sup>3</sup> |
|     | IgM_Beta Amyloid        | ▲                | ▲                |                  |     |         |                  |                  |                  |
|     | IgM_Amyloid beta 1-12   | ▲                |                  | ▼                |     |         |                  |                  |                  |
|     | IgM_Amyloid beta 1-23   | ▲                |                  | ▼                |     |         |                  |                  |                  |
|     | IgM_Amyloid beta 10-20  | ▲                |                  |                  |     |         |                  |                  |                  |
|     | IgM_Amyloid beta 12-28  |                  |                  |                  |     |         |                  |                  |                  |
|     | IgG_Amyloid beta 17-40  |                  |                  | ▲                |     |         |                  |                  |                  |
|     | IgM_Amyloid beta 1-42   | ▲                |                  | ▲                |     |         |                  |                  |                  |
|     | IgM_AB 1-40             |                  | ▲                |                  |     |         |                  |                  |                  |
|     | IgG_beta Crystallin     |                  |                  | ▲                |     |         |                  |                  |                  |
|     | IgM_bovineMBP           | ▲                | ▲                |                  |     |         |                  |                  |                  |
|     | IgM_CNP 1-20            | ▲                | ▲                |                  |     |         |                  |                  |                  |
|     | IgM_CNP 16-35           | ▲                |                  | ▲                |     |         |                  |                  |                  |
|     | IgM_CNP 61-80           | ▲                |                  |                  |     |         |                  |                  |                  |
|     | IgM_CNP 76-95           | ▲                |                  |                  |     |         |                  |                  |                  |
|     | IgM_CNP 91-110          | ▲                |                  |                  |     |         |                  |                  |                  |
|     | IgM_CNP 121-140         |                  |                  | ▼                |     |         |                  |                  |                  |
|     | IgM_CNP 181-199         |                  |                  | ▼                |     |         |                  |                  |                  |
|     | IgM_CNP 195-214         |                  |                  | ▼                |     |         |                  |                  |                  |
|     | IgM_CNP 240-259         | ▲                |                  |                  |     |         |                  |                  |                  |
|     | IgM_CNP 271-290         | ▲                |                  |                  |     |         |                  |                  |                  |
|     | IgM_CNP 286-305         | ▲                |                  | ▼                |     |         |                  |                  |                  |
|     | IgM_CNP 301-320         | ▲                |                  |                  |     |         |                  |                  |                  |
|     | IgM_CNP 346-365         |                  |                  | ▼                |     |         |                  |                  |                  |
|     | IgM_CNP 361-380         |                  |                  | ▼                |     |         |                  |                  |                  |
|     | IgM_CNP 376-395         |                  |                  | ▼                |     |         |                  |                  |                  |
|     | IgM_CNP 391-410         | ▲                |                  |                  |     |         |                  |                  |                  |
|     | IgM_CNP 406-421         | ▲                |                  |                  |     |         |                  |                  |                  |
|     | IgM_Neurofilament 68kDa |                  | ▲                |                  |     |         |                  |                  |                  |
|     | IgM_gpMBP               |                  | ▲                |                  |     |         |                  |                  |                  |
|     | IgM_bovineMBP           |                  |                  | ▼                |     |         |                  |                  |                  |
|     | IgM_mMBP                |                  | ▼                | ▼                |     |         |                  |                  |                  |
|     | IgM_MBP 1-20            |                  |                  | ▼                |     |         |                  |                  |                  |
|     | IgM_MBP 11-30           | ▲                |                  |                  |     |         |                  |                  |                  |
|     | IgM_MBP 41-60           | ▲                |                  |                  |     |         |                  |                  |                  |
|     | IgM_MBP 51-70           | ▲                |                  |                  |     |         |                  |                  |                  |
|     | IgM_MBP 71-92           | ▲                |                  |                  |     |         |                  |                  |                  |
|     | IgM_MBP 84-94           | ▲                |                  |                  |     |         |                  |                  |                  |
|     | IgM_MBP 89-101          | ▲                |                  |                  |     |         |                  |                  |                  |
|     | IgM_MBP 104-123         | ▲                | ▲                |                  |     |         |                  |                  |                  |
|     | IgM_MBP 138-147         |                  |                  | ▼                |     |         |                  |                  |                  |
|     | IgM_MBP 155-178         |                  |                  | ▼                |     |         |                  |                  |                  |
|     | IgM_MOBP 61-80          |                  | ▲                |                  |     |         |                  |                  |                  |
|     | IgM_MOBP 151-170        | ▲                |                  |                  |     |         |                  |                  |                  |
|     | IgM_MOBP 166-185        |                  |                  | ▼                |     |         |                  |                  |                  |
|     | IgM_MOG 31-50           |                  |                  | ▼                |     |         |                  |                  |                  |
|     | IgM_MOG 61-80           |                  |                  | ▼                |     |         |                  |                  |                  |
|     | IgM_MOG 106-125         | ▲                |                  |                  |     |         |                  |                  |                  |
|     | IgM_MOG 196-215         | ▲                |                  |                  |     |         |                  |                  |                  |
|     | IgM_MOG 211-230         | ▲                |                  |                  |     |         |                  |                  |                  |
|     | IgM_MOG 76-95           | ▲                |                  |                  |     |         |                  |                  |                  |
|     | IgM_MOG 91-110          | ▲                |                  |                  |     |         |                  |                  |                  |
|     | IgM_OSP 1-20            |                  |                  | ▼                |     |         |                  |                  |                  |
|     | IgM_OSP 31-50           | ▲                |                  |                  |     |         |                  |                  |                  |
|     | IgM_OSP 61-80           | ▲                |                  | ▼                |     |         |                  |                  |                  |
|     | IgM_OSP 121-140         |                  |                  | ▼                |     |         |                  |                  |                  |
|     | IgM_OSP 136-155         | ▲                |                  |                  |     |         |                  |                  |                  |
|     | IgM_OSP 76-95           | ▲                |                  |                  |     |         |                  |                  |                  |
|     | IgM_P2 1-20             |                  |                  | ▼                |     |         |                  |                  |                  |
|     | IgM_P2 31-50            |                  |                  | ▼                |     |         |                  |                  |                  |
|     | IgM_P2 46-65            |                  |                  | ▼                |     |         |                  |                  |                  |
|     | IgM_P2 61-80            | ▲                |                  |                  |     |         |                  |                  |                  |
|     | IgM_P2 76-95            | ▲                |                  |                  |     |         |                  |                  |                  |
|     | IgM_PLP 1-19            |                  |                  | ▲                |     |         |                  |                  |                  |
|     | IgM_PLP 10-29           | ▲                |                  |                  |     |         |                  |                  |                  |
|     | IgM_PLP 40-59           |                  | ▲                |                  |     |         |                  |                  |                  |
|     | IgG_PLP 80-99           |                  |                  | ▲                |     |         |                  |                  |                  |
|     | IgM_PLP 137-150         |                  | ▲                |                  |     |         |                  |                  |                  |
|     | IgM_PLP 150-163         |                  |                  | ▼                |     |         |                  |                  |                  |
|     | IgM_PLP 161-180         |                  | ▲                |                  |     |         |                  |                  |                  |
|     | IgM_PLP 178-191         | ▲                |                  |                  |     |         |                  |                  |                  |
|     | IgM_PLP 180-199         | ▲                |                  |                  |     |         |                  |                  |                  |
|     | IgM_PLP 190-209         | ▲                |                  |                  |     |         |                  |                  |                  |
|     | IgM_PLP 215-232         |                  | ▼                |                  |     |         |                  |                  |                  |
|     | IgM_PLP 220-249         | ▲                |                  |                  |     |         |                  |                  |                  |
|     | IgM_PLP 248-259         | ▲                |                  |                  |     |         |                  |                  |                  |
|     | IgM_PLP 250-269         | ▲                |                  |                  |     |         |                  |                  |                  |
|     | IgG_RBP                 |                  |                  | ▼                |     |         |                  |                  |                  |
|     | IgM_Secreted APPalpha   |                  | ▲                | ▼                |     |         |                  |                  |                  |
|     | IgM_SOD                 |                  | ▲                |                  |     |         |                  |                  |                  |

Antibody reactivity to CNS antigens is shown as a black square, with a white arrow indicating whether it is up- or down- regulated relative to HC (for RRMS and PPMS) or RRMS (for SPMS). CNP, 2',3'-cyclic nucleotide 3'-phosphodiesterase; MOBP, myelin-associated oligodendrocytic basic protein; MOG, myelin/oligodendrocyte glycoprotein; MBP, myelin basic protein; P2, myelin protein 2; OSP, oligodendrocyte-specific Protein; PLP, proteolipid protein; AB, amyloid  $\beta$ .
